# Supplementary material for: Phytoplankton Community Response to Environmental Factors along a Salinity Gradient in a Seagoing River, Tianjin, China
Source: MDPI journal article supplement (doi:10.3390/microorganisms11010075), 2022-12-27
Supplement: s1 [file s1]

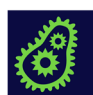

## Article

# Phytoplankton Community Response to Environmental Factors Along a Salinity Gradient in a Seagoing River, Tianjin, China

Xuewei Sun, Huayong Zhang \*, Zhongyu Wang, Tousheng Huang and Hai Huang

Research Center for Engineering Ecology and Nonlinear Science, North China Electric Power University, Beijing 102206, China

\* Correspondence: rceens@ncepu.edu.cn

## Supplementary Materials

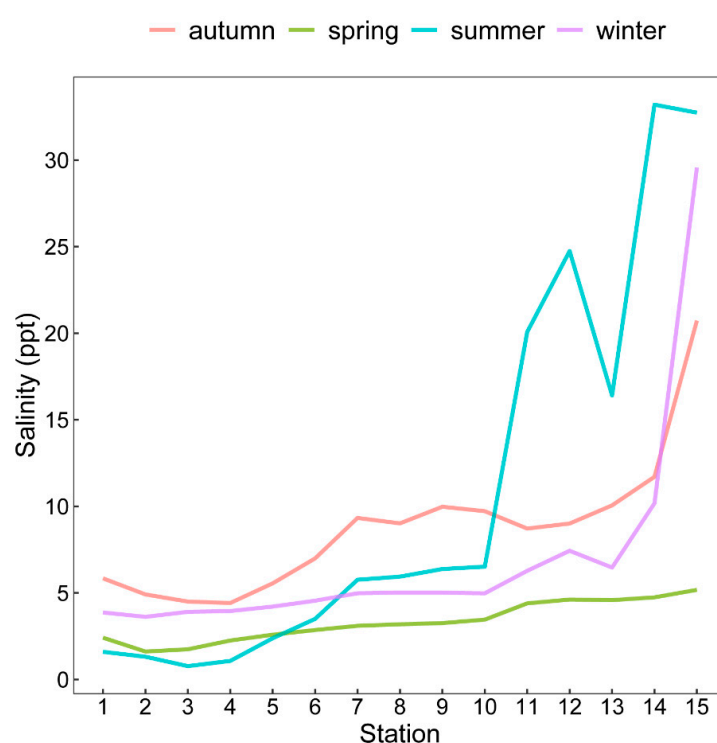

Figure S1. Spatial variations of salinity along the river in four seasons.

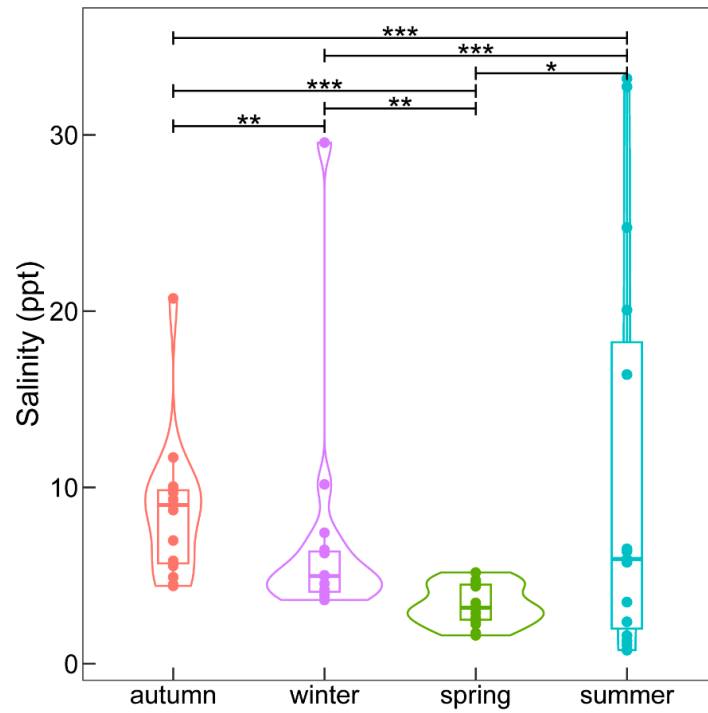

**Figure S2.** Seasonal variations of salinity between seasons. “\*\*\*\*” denotes  $p < 0.01$ , while “\*\*\*” for  $p < 0.05$  and “\*\*” for  $p < 0.1$ .

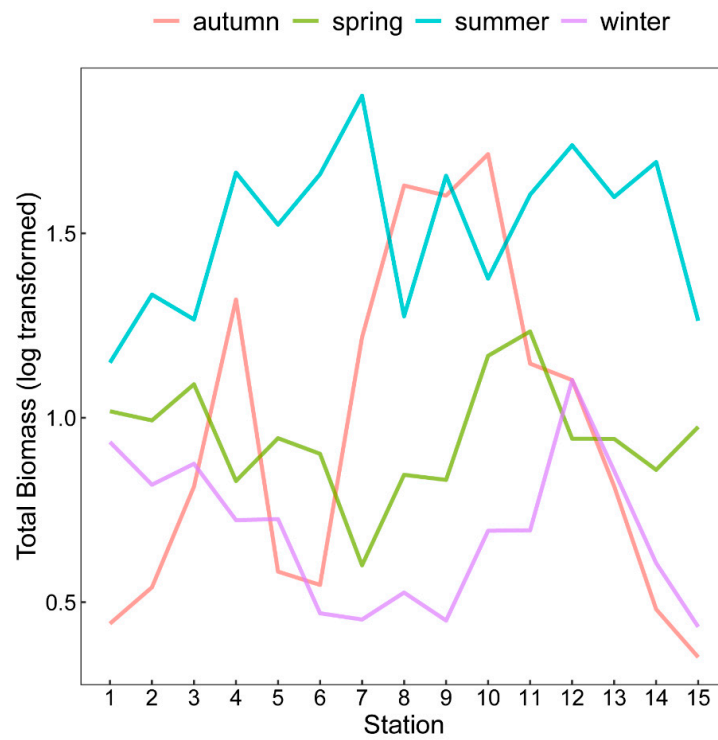

**Figure S3.** Spatial variations of total biomass along the river in four seasons.

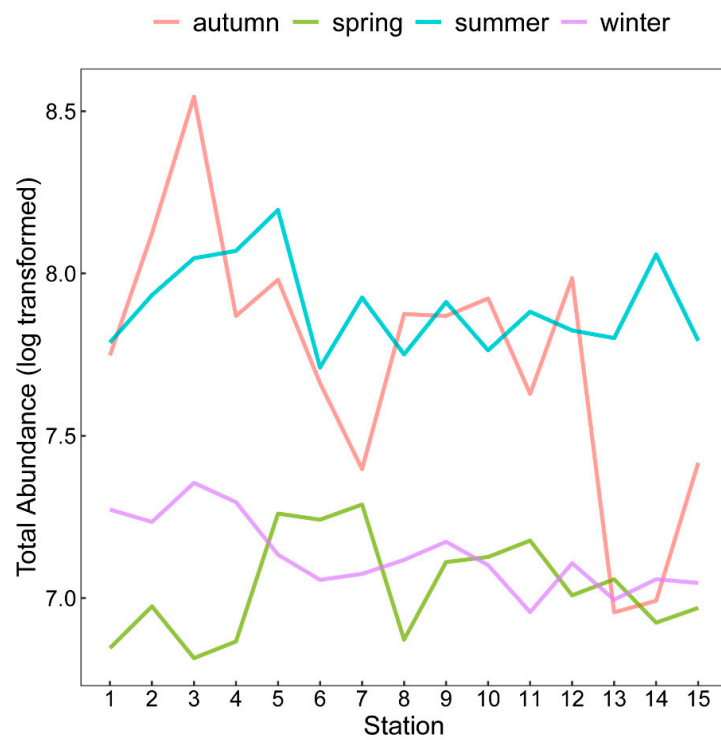

**Figure S4.** Spatial variations of total abundance along the river in four seasons.

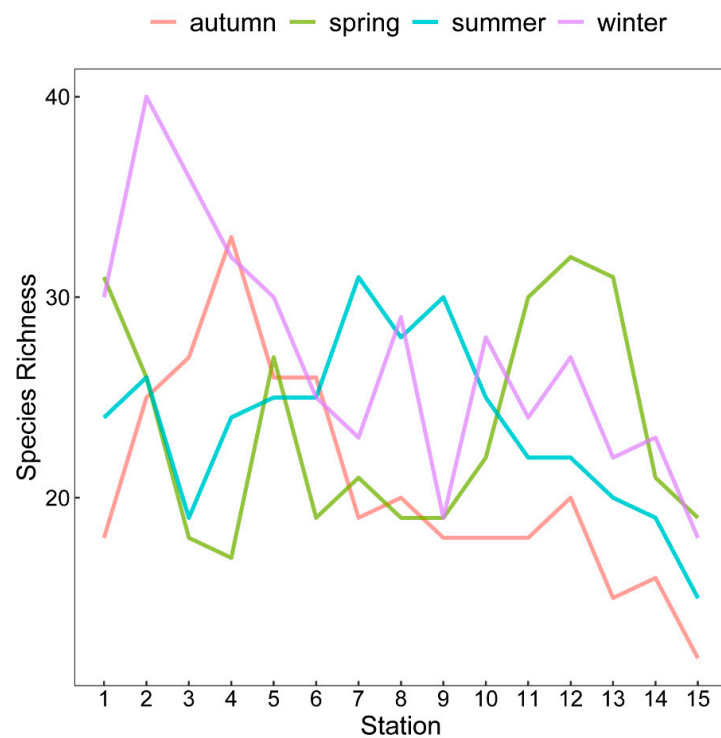

**Figure S5.** Spatial variations of species richness along the river in four seasons.

**Table S1.** Analytical method of water environmental factors.

| Environmental factors         | Abbreviation                  | Analytical method                                                                          | Unit |
|-------------------------------|-------------------------------|--------------------------------------------------------------------------------------------|------|
| Water temperature             | WT                            | YSI ProPlus                                                                                | °C   |
| pH                            | pH                            | YSI ProPlus                                                                                |      |
| Dissolved oxygen              | DO                            | YSI ProPlus                                                                                | mg/L |
| Salinity                      | SAL                           | YSI ProPlus                                                                                | ppt  |
| Oxidation-reduction potential | ORP                           | YSI ProPlus                                                                                | mv   |
| Water depth                   | WD                            | Meter stick                                                                                | m    |
| Water transparency            | SD                            | Secchi disk                                                                                | cm   |
| Total nitrogen                | TN                            | Alkaline potassium persulfate digestion UV spectrophotometric method                       | mg/L |
| Total dissolved nitrogen      | TDN                           | Alkaline potassium persulfate digestion UV spectrophotometric method                       | mg/L |
| Total phosphorus              | TP                            | Ammonium molybdate spectrophotometric method                                               | mg/L |
| Total dissolved phosphorus    | TDP                           | Ammonium molybdate spectrophotometric method                                               | mg/L |
| Chemical oxygen demand        | COD                           | Dichromate method or chloride ion calibration method                                       | mg/L |
| Turbidity                     | TUR                           | Hach turbidity tester                                                                      | NTU  |
| Orthophosphate                | PO <sub>4</sub> <sup>3-</sup> | Molybdenum-antimony anti-spectrophotometric method                                         | mg/L |
| Ammonium nitrogen             | NH <sub>4</sub> <sup>+</sup>  | Nessler's reagent spectrophotometric method                                                | mg/L |
| Nitrate                       | NO <sub>3</sub> <sup>-</sup>  | Gas phase molecular Absorption spectrum method                                             | mg/L |
| Nitrite                       | NO <sub>2</sub> <sup>-</sup>  | Gas phase molecular Absorption spectrum method                                             | mg/L |
| Dissolved inorganic nitrogen  | DIN                           | NH <sub>4</sub> <sup>+</sup> + NO <sub>3</sub> <sup>-</sup> + NO <sub>2</sub> <sup>-</sup> | mg/L |

**Table S2.** Environmental factors in Duliujian River. Max = maximum values, Min = minimum values, SD = standard deviation.

| Environmental factors               | Autumn |       |        |       | Winter |       |        |       | Spring |        |        |       | Summer |       |        |       |
|-------------------------------------|--------|-------|--------|-------|--------|-------|--------|-------|--------|--------|--------|-------|--------|-------|--------|-------|
|                                     | Max    | Min   | Mean   | SD    | Max    | Min   | Mean   | SD    | Max    | Min    | Mean   | SD    | Max    | Min   | Mean   | SD    |
| pH                                  | 9.73   | 8.65  | 9.16   | 0.39  | 9.19   | 8.39  | 8.92   | 0.21  | 9.13   | 8.35   | 8.78   | 0.19  | 9.10   | 8.08  | 8.53   | 0.28  |
| Salinity (ppt)                      | 20.73  | 4.42  | 8.70   | 4.05  | 29.57  | 3.62  | 6.93   | 6.49  | 5.18   | 1.61   | 3.33   | 1.14  | 33.20  | 0.77  | 10.83  | 11.58 |
| Total nitrogen (mg/L)               | 3.11   | 1.41  | 2.03   | 0.57  | 4.19   | 2.28  | 3.13   | 0.52  | 5.11   | 4.00   | 4.59   | 0.26  | 8.07   | 1.69  | 3.44   | 1.80  |
| Total phosphorus (mg/L)             | 0.59   | 0.27  | 0.43   | 0.08  | 0.41   | 0.19  | 0.33   | 0.05  | 0.42   | 0.34   | 0.38   | 0.03  | 0.77   | 0.07  | 0.34   | 0.20  |
| Total dissolved nitrogen (mg/L)     | 2.71   | 0.92  | 1.19   | 0.44  | 3.06   | 1.75  | 2.20   | 0.42  | 3.70   | 1.87   | 2.88   | 0.40  | 7.03   | 0.97  | 2.13   | 1.83  |
| Total dissolved phosphorus (mg/L)   | 0.39   | 0.06  | 0.26   | 0.09  | 0.23   | 0.07  | 0.15   | 0.04  | 0.11   | 0.05   | 0.07   | 0.02  | 0.50   | 0.00  | 0.13   | 0.16  |
| Orthophosphate (mg/L)               | 0.32   | 0.05  | 0.23   | 0.07  | 0.19   | 0.04  | 0.11   | 0.04  | 0.06   | 0.01   | 0.02   | 0.02  | 0.46   | 0.00  | 0.10   | 0.16  |
| Dissolved inorganic nitrogen (mg/L) | 0.51   | 0.11  | 0.29   | 0.10  | 2.37   | 0.70  | 1.43   | 0.51  | 2.34   | 0.67   | 1.32   | 0.48  | 0.77   | 0.14  | 0.30   | 0.16  |
| Water temperature (°C)              | 28.93  | 25.20 | 26.88  | 1.00  | 8.60   | 1.73  | 2.84   | 1.63  | 16.27  | 12.47  | 14.00  | 1.15  | 29.27  | 25.80 | 27.35  | 0.99  |
| Dissolved oxygen (mg/L)             | 15.72  | 3.35  | 8.99   | 3.48  | 14.68  | 7.65  | 11.85  | 1.82  | 15.92  | 9.00   | 12.71  | 1.92  | 11.08  | 4.64  | 7.54   | 2.07  |
| Oxidation-reduction potential (mv)  | 116.63 | 86.80 | 102.18 | 9.50  | 168.07 | 96.50 | 140.63 | 17.58 | 221.93 | 112.77 | 156.01 | 36.30 | 168.57 | 70.47 | 132.27 | 31.23 |
| Turbidity (NTU)                     | 77.28  | 7.85  | 35.57  | 22.60 | 34.16  | 11.11 | 15.41  | 5.57  | 36.49  | 14.70  | 20.82  | 6.44  | 54.83  | 12.72 | 27.37  | 13.96 |
| Water transparency (cm)             | 98.83  | 38.83 | 59.74  | 17.95 | 67.33  | 41.67 | 52.96  | 6.79  | 48.67  | 34.00  | 42.80  | 3.93  | 57.00  | 27.00 | 38.84  | 9.42  |
| Water depth (m)                     | 3.99   | 1.28  | 2.65   | 0.71  | 4.42   | 1.12  | 3.09   | 0.85  | 5.46   | 1.43   | 2.81   | 1.01  | 2.99   | 1.28  | 2.25   | 0.57  |
| Chemical oxygen demand (mg/L)       | 11.80  | 7.81  | 9.04   | 1.04  | 12.60  | 8.11  | 10.12  | 1.25  | 13.83  | 9.19   | 11.97  | 1.24  | 10.25  | 7.08  | 8.88   | 0.77  |
| Ammonium nitrogen (mg/L)            | 0.51   | 0.11  | 0.26   | 0.11  | 1.04   | 0.26  | 0.46   | 0.24  | 1.31   | 0.15   | 0.43   | 0.41  | 0.70   | 0.12  | 0.26   | 0.15  |
| Nitrate (mg/L)                      | 0.16   | 0.00  | 0.03   | 0.04  | 1.68   | 0.27  | 0.81   | 0.41  | 1.25   | 0.47   | 0.80   | 0.25  | 0.06   | 0.47  | 0.03   | 0.02  |
| Nitrite (mg/L)                      | 0.02   | 0.00  | 0.00   | 0.01  | 0.21   | 0.03  | 0.16   | 0.06  | 0.12   | 0.05   | 0.08   | 0.01  | 0.06   | 0.05  | 0.01   | 0.02  |

**Table S3.** Bray-Curtis distance of phytoplankton structure between stations in different seasons.

| Autumn | aut1 | aut2 | aut3 | aut4 | aut5 | aut6 | aut7 | aut8 | aut9 | aut10 | aut11 | aut12 | aut13 | aut14 | aut15 |
|--------|------|------|------|------|------|------|------|------|------|-------|-------|-------|-------|-------|-------|
| aut1   | 0.00 |      |      |      |      |      |      |      |      |       |       |       |       |       |       |
| aut2   | 0.39 | 0.00 |      |      |      |      |      |      |      |       |       |       |       |       |       |
| aut3   | 0.38 | 0.28 | 0.00 |      |      |      |      |      |      |       |       |       |       |       |       |
| aut4   | 0.53 | 0.49 | 0.50 | 0.00 |      |      |      |      |      |       |       |       |       |       |       |
| aut5   | 0.42 | 0.46 | 0.40 | 0.46 | 0.00 |      |      |      |      |       |       |       |       |       |       |
| aut6   | 0.52 | 0.39 | 0.38 | 0.52 | 0.37 | 0.00 |      |      |      |       |       |       |       |       |       |
| aut7   | 0.62 | 0.39 | 0.42 | 0.54 | 0.38 | 0.40 | 0.00 |      |      |       |       |       |       |       |       |
| aut8   | 0.49 | 0.49 | 0.42 | 0.48 | 0.58 | 0.50 | 0.43 | 0.00 |      |       |       |       |       |       |       |
| aut9   | 0.66 | 0.46 | 0.48 | 0.46 | 0.47 | 0.47 | 0.26 | 0.36 | 0.00 |       |       |       |       |       |       |
| aut10  | 0.50 | 0.45 | 0.48 | 0.42 | 0.50 | 0.50 | 0.36 | 0.31 | 0.28 | 0.00  |       |       |       |       |       |
| aut11  | 0.51 | 0.45 | 0.44 | 0.46 | 0.47 | 0.43 | 0.41 | 0.33 | 0.34 | 0.18  | 0.00  |       |       |       |       |
| aut12  | 0.53 | 0.57 | 0.49 | 0.48 | 0.49 | 0.45 | 0.50 | 0.32 | 0.42 | 0.38  | 0.28  | 0.00  |       |       |       |
| aut13  | 0.53 | 0.60 | 0.63 | 0.52 | 0.58 | 0.62 | 0.60 | 0.34 | 0.46 | 0.30  | 0.24  | 0.28  | 0.00  |       |       |
| aut14  | 0.64 | 0.61 | 0.50 | 0.52 | 0.54 | 0.53 | 0.49 | 0.45 | 0.48 | 0.37  | 0.30  | 0.29  | 0.36  | 0.00  |       |
| aut15  | 0.47 | 0.62 | 0.69 | 0.65 | 0.65 | 0.69 | 0.67 | 0.51 | 0.60 | 0.54  | 0.47  | 0.51  | 0.36  | 0.49  | 0.00  |
| Winter | win1 | win2 | win3 | win4 | win5 | win6 | win7 | win8 | win9 | win10 | win11 | win12 | win13 | win14 | win15 |
| win1   | 0.00 |      |      |      |      |      |      |      |      |       |       |       |       |       |       |
| win2   | 0.41 | 0.00 |      |      |      |      |      |      |      |       |       |       |       |       |       |
| win3   | 0.43 | 0.33 | 0.00 |      |      |      |      |      |      |       |       |       |       |       |       |
| win4   | 0.41 | 0.37 | 0.33 | 0.00 |      |      |      |      |      |       |       |       |       |       |       |
| win5   | 0.47 | 0.41 | 0.43 | 0.48 | 0.00 |      |      |      |      |       |       |       |       |       |       |
| win6   | 0.45 | 0.49 | 0.45 | 0.45 | 0.50 | 0.00 |      |      |      |       |       |       |       |       |       |
| win7   | 0.56 | 0.48 | 0.50 | 0.43 | 0.55 | 0.45 | 0.00 |      |      |       |       |       |       |       |       |
| win8   | 0.53 | 0.47 | 0.57 | 0.54 | 0.43 | 0.38 | 0.43 | 0.00 |      |       |       |       |       |       |       |
| win9   | 0.60 | 0.56 | 0.56 | 0.46 | 0.55 | 0.40 | 0.38 | 0.45 | 0.00 |       |       |       |       |       |       |
| win10  | 0.54 | 0.44 | 0.52 | 0.45 | 0.33 | 0.48 | 0.43 | 0.36 | 0.47 | 0.00  |       |       |       |       |       |
| win11  | 0.53 | 0.47 | 0.64 | 0.47 | 0.53 | 0.51 | 0.54 | 0.37 | 0.50 | 0.42  | 0.00  |       |       |       |       |
| win12  | 0.47 | 0.50 | 0.49 | 0.44 | 0.53 | 0.51 | 0.52 | 0.43 | 0.51 | 0.43  | 0.42  | 0.00  |       |       |       |
| win13  | 0.51 | 0.55 | 0.63 | 0.55 | 0.54 | 0.57 | 0.51 | 0.38 | 0.46 | 0.40  | 0.31  | 0.38  | 0.00  |       |       |
| win14  | 0.55 | 0.41 | 0.57 | 0.53 | 0.52 | 0.57 | 0.56 | 0.46 | 0.47 | 0.45  | 0.37  | 0.43  | 0.45  | 0.00  |       |
| win15  | 0.63 | 0.56 | 0.67 | 0.57 | 0.55 | 0.57 | 0.60 | 0.45 | 0.50 | 0.53  | 0.44  | 0.51  | 0.36  | 0.46  | 0.00  |
| Spring | spr1 | spr2 | spr3 | spr4 | spr5 | spr6 | spr7 | spr8 | spr9 | spr10 | spr11 | spr12 | spr13 | spr14 | spr15 |
| spr1   | 0.00 |      |      |      |      |      |      |      |      |       |       |       |       |       |       |
| spr2   | 0.33 | 0.00 |      |      |      |      |      |      |      |       |       |       |       |       |       |
| spr3   | 0.47 | 0.42 | 0.00 |      |      |      |      |      |      |       |       |       |       |       |       |
| spr4   | 0.56 | 0.51 | 0.56 | 0.00 |      |      |      |      |      |       |       |       |       |       |       |
| spr5   | 0.53 | 0.58 | 0.65 | 0.65 | 0.00 |      |      |      |      |       |       |       |       |       |       |
| spr6   | 0.48 | 0.51 | 0.62 | 0.53 | 0.48 | 0.00 |      |      |      |       |       |       |       |       |       |
| spr7   | 0.57 | 0.50 | 0.58 | 0.54 | 0.46 | 0.41 | 0.00 |      |      |       |       |       |       |       |       |
| spr8   | 0.53 | 0.39 | 0.63 | 0.58 | 0.45 | 0.34 | 0.37 | 0.00 |      |       |       |       |       |       |       |
| spr9   | 0.60 | 0.59 | 0.73 | 0.64 | 0.60 | 0.40 | 0.50 | 0.37 | 0.00 |       |       |       |       |       |       |
| spr10  | 0.53 | 0.51 | 0.56 | 0.61 | 0.51 | 0.45 | 0.54 | 0.48 | 0.42 | 0.00  |       |       |       |       |       |
| spr11  | 0.41 | 0.44 | 0.63 | 0.60 | 0.47 | 0.45 | 0.57 | 0.45 | 0.43 | 0.35  | 0.00  |       |       |       |       |
| spr12  | 0.44 | 0.46 | 0.57 | 0.65 | 0.50 | 0.59 | 0.54 | 0.48 | 0.50 | 0.53  | 0.35  | 0.00  |       |       |       |
| spr13  | 0.50 | 0.51 | 0.67 | 0.59 | 0.53 | 0.59 | 0.69 | 0.48 | 0.52 | 0.48  | 0.50  | 0.53  | 0.00  |       |       |
| spr14  | 0.43 | 0.40 | 0.60 | 0.58 | 0.66 | 0.64 | 0.62 | 0.50 | 0.59 | 0.59  | 0.50  | 0.57  | 0.46  | 0.00  |       |
| spr15  | 0.49 | 0.44 | 0.54 | 0.54 | 0.63 | 0.50 | 0.62 | 0.40 | 0.44 | 0.48  | 0.37  | 0.50  | 0.40  | 0.40  | 0.00  |
| Summer | sum1 | sum2 | sum3 | sum4 | sum5 | sum6 | sum7 | sum8 | sum9 | sum10 | sum11 | sum12 | sum13 | sum14 | sum15 |
| sum1   | 0.00 |      |      |      |      |      |      |      |      |       |       |       |       |       |       |
| sum2   | 0.40 | 0.00 |      |      |      |      |      |      |      |       |       |       |       |       |       |
| sum3   | 0.43 | 0.36 | 0.00 |      |      |      |      |      |      |       |       |       |       |       |       |
| sum4   | 0.45 | 0.25 | 0.27 | 0.00 |      |      |      |      |      |       |       |       |       |       |       |
| sum5   | 0.42 | 0.41 | 0.40 | 0.41 | 0.00 |      |      |      |      |       |       |       |       |       |       |
| sum6   | 0.38 | 0.42 | 0.41 | 0.43 | 0.32 | 0.00 |      |      |      |       |       |       |       |       |       |
| sum7   | 0.48 | 0.40 | 0.51 | 0.44 | 0.40 | 0.33 | 0.00 |      |      |       |       |       |       |       |       |
| sum8   | 0.36 | 0.39 | 0.60 | 0.53 | 0.44 | 0.33 | 0.24 | 0.00 |      |       |       |       |       |       |       |
| sum9   | 0.59 | 0.44 | 0.51 | 0.45 | 0.39 | 0.36 | 0.39 | 0.49 | 0.00 |       |       |       |       |       |       |
| sum10  | 0.58 | 0.42 | 0.59 | 0.51 | 0.45 | 0.45 | 0.34 | 0.48 | 0.35 | 0.00  |       |       |       |       |       |
| sum11  | 0.48 | 0.42 | 0.56 | 0.43 | 0.42 | 0.42 | 0.34 | 0.41 | 0.35 | 0.27  | 0.00  |       |       |       |       |
| sum12  | 0.56 | 0.42 | 0.52 | 0.40 | 0.46 | 0.45 | 0.37 | 0.49 | 0.43 | 0.32  | 0.23  | 0.00  |       |       |       |
| sum13  | 0.47 | 0.41 | 0.58 | 0.50 | 0.44 | 0.43 | 0.43 | 0.39 | 0.44 | 0.29  | 0.20  | 0.25  | 0.00  |       |       |
| sum14  | 0.48 | 0.43 | 0.53 | 0.49 | 0.47 | 0.38 | 0.41 | 0.42 | 0.40 | 0.41  | 0.23  | 0.27  | 0.24  | 0.00  |       |

|       |      |      |      |      |      |      |      |      |      |      |      |      |      |      |      |
|-------|------|------|------|------|------|------|------|------|------|------|------|------|------|------|------|
| sum15 | 0.49 | 0.48 | 0.59 | 0.59 | 0.56 | 0.47 | 0.41 | 0.41 | 0.47 | 0.39 | 0.36 | 0.42 | 0.33 | 0.31 | 0.00 |
|-------|------|------|------|------|------|------|------|------|------|------|------|------|------|------|------|

**Table S4.** Absolute data of abiotic factors.

| Station | SAL   | COD  | TDP  | TDN  | PO <sub>4</sub> <sup>3-</sup> |
|---------|-------|------|------|------|-------------------------------|
| aut1    | 5.84  | 1.16 | 0.28 | 0.31 | 5.84                          |
| aut2    | 4.91  | 1.06 | 0.39 | 0.26 | 4.91                          |
| aut3    | 4.50  | 0.92 | 0.27 | 0.26 | 4.50                          |
| aut4    | 4.42  | 0.97 | 0.12 | 0.10 | 4.42                          |
| aut5    | 5.55  | 1.03 | 0.22 | 0.20 | 5.55                          |
| aut6    | 6.99  | 1.00 | 0.35 | 0.32 | 6.99                          |
| aut7    | 9.33  | 1.03 | 0.29 | 0.27 | 9.33                          |
| aut8    | 9.02  | 1.06 | 0.25 | 0.22 | 9.02                          |
| aut9    | 9.98  | 0.99 | 0.30 | 0.27 | 9.98                          |
| aut10   | 9.72  | 1.05 | 0.31 | 0.28 | 9.72                          |
| aut11   | 8.72  | 1.06 | 0.31 | 0.27 | 8.72                          |
| aut12   | 9.01  | 1.38 | 0.28 | 0.25 | 9.01                          |
| aut13   | 10.06 | 1.14 | 0.24 | 0.20 | 10.06                         |
| aut14   | 11.71 | 1.31 | 0.19 | 0.16 | 11.71                         |
| aut15   | 20.73 | 2.71 | 0.06 | 0.05 | 20.73                         |
| win1    | 3.87  | 1.78 | 0.12 | 0.08 | 3.87                          |
| win2    | 3.62  | 2.23 | 0.14 | 0.10 | 3.62                          |
| win3    | 3.91  | 2.43 | 0.14 | 0.11 | 3.91                          |
| win4    | 3.95  | 3.06 | 0.23 | 0.19 | 3.95                          |
| win5    | 4.21  | 2.99 | 0.20 | 0.15 | 4.21                          |
| win6    | 4.55  | 2.65 | 0.20 | 0.14 | 4.55                          |
| win7    | 4.98  | 2.20 | 0.19 | 0.14 | 4.98                          |
| win8    | 5.02  | 2.00 | 0.17 | 0.12 | 5.02                          |
| win9    | 5.01  | 2.01 | 0.17 | 0.12 | 5.01                          |
| win10   | 4.98  | 2.00 | 0.16 | 0.11 | 4.98                          |
| win11   | 6.28  | 1.98 | 0.15 | 0.10 | 6.28                          |
| win12   | 7.43  | 1.84 | 0.14 | 0.09 | 7.43                          |
| win13   | 6.47  | 1.77 | 0.13 | 0.08 | 6.47                          |
| win14   | 10.18 | 1.75 | 0.10 | 0.05 | 10.18                         |
| win15   | 29.57 | 2.30 | 0.07 | 0.04 | 29.57                         |
| spr1    | 2.41  | 1.87 | 0.05 | 0.01 | 2.41                          |
| spr2    | 1.61  | 2.92 | 0.05 | 0.01 | 1.61                          |
| spr3    | 1.74  | 2.73 | 0.05 | 0.01 | 1.74                          |
| spr4    | 2.25  | 3.01 | 0.06 | 0.02 | 2.25                          |
| spr5    | 2.59  | 3.35 | 0.05 | 0.01 | 2.59                          |
| spr6    | 2.86  | 3.70 | 0.11 | 0.06 | 2.86                          |
| spr7    | 3.10  | 3.21 | 0.08 | 0.03 | 3.10                          |
| spr8    | 3.19  | 2.94 | 0.06 | 0.01 | 3.19                          |
| spr9    | 3.26  | 2.80 | 0.05 | 0.01 | 3.26                          |
| spr10   | 3.46  | 2.77 | 0.06 | 0.01 | 3.46                          |
| spr11   | 4.40  | 2.95 | 0.08 | 0.03 | 4.40                          |
| spr12   | 4.62  | 2.94 | 0.08 | 0.03 | 4.62                          |
| spr13   | 4.58  | 2.74 | 0.08 | 0.02 | 4.58                          |
| spr14   | 4.74  | 2.72 | 0.07 | 0.01 | 4.74                          |
| spr15   | 5.18  | 2.61 | 0.05 | 0.01 | 5.18                          |
| sum1    | 1.60  | 1.13 | 0.23 | 0.19 | 1.60                          |
| sum2    | 1.31  | 1.17 | 0.50 | 0.46 | 1.31                          |
| sum3    | 0.77  | 1.45 | 0.36 | 0.32 | 0.77                          |
| sum4    | 1.07  | 0.99 | 0.38 | 0.36 | 1.07                          |
| sum5    | 2.38  | 0.97 | 0.15 | 0.12 | 2.38                          |
| sum6    | 3.50  | 1.03 | 0.05 | 0.02 | 3.50                          |
| sum7    | 5.76  | 1.22 | 0.05 | 0.02 | 5.76                          |
| sum8    | 5.94  | 1.33 | 0.04 | 0.01 | 5.94                          |

---

|       |       |      |      |      |       |
|-------|-------|------|------|------|-------|
| sum9  | 6.38  | 1.31 | 0.04 | 0.01 | 6.38  |
| sum10 | 6.52  | 1.34 | 0.04 | 0.02 | 6.52  |
| sum11 | 20.07 | 2.23 | 0.02 | 0.01 | 20.07 |
| sum12 | 24.75 | 2.34 | 0.02 | 0.01 | 24.75 |
| sum13 | 16.41 | 2.54 | 0.02 | 0.01 | 16.41 |
| sum14 | 33.20 | 7.03 | 0.00 | 0.00 | 33.20 |
| sum15 | 32.74 | 5.80 | 0.01 | 0.00 | 32.74 |

---
